# Supplementary material for: LINT, a Novel dL(3)mbt-Containing Complex, Represses Malignant Brain Tumour Signature Genes
Source: PLoS Genet. 2012 May 3;8(5):e1002676. doi: 10.1371/journal.pgen.1002676 (PMC3342951; doi:10.1371/journal.pgen.1002676)
Supplement: Table S1 — dL(3)mbt and dLint-1 bind to germline-specific MBTS and SWH target genes. Genes were visually inspected for dL(3)mbt peaks (Richter et al. 2011), dLint-1 peaks in Kc cells and dLint-1 peaks in S2 cells. +: at least one peak. (DOC) [file pgen.1002676.s007.doc]

**Table S1:**

| **Gene group** | **Genes** | **L(3)mbt** | **Lint-1 in Kc** | **Lint-1 in S2** |
| --- | --- | --- | --- | --- |
| **Germline-specific**  **MBTS genes** | Pxt | + | + | + |
| Fs(1)Yb | + | + | + |
| tej/CG8589 | + | + | + |
| zpg | + | + | + |
| bcgn | + | + | + |
| topi | + | + | + |
| TrxT | + | + | + |
| hdm | + | + | + |
| nos | + | + | + |
| ea | + | + | + |
| vas | + | + | + |
| CG9925 | + | + | + |
| krimp | + | + | + |
| dhd | + | + | + |
| CG7795 | + | + | + |
| piwi | + | + | + |
| RpS5b | + | + | + |
| gnu | + | + | + |
| CG32313 | + | + | + |
| mia | + | + | + |
| CG15930 | + | + | + |
| fus | + | + | + |
| stil | + | + | + |
| tor | + | + | - |
| γTub37C | + | (+) | + |
| tud | + | (+) | + |
| CG31755 | + | - | + |
| swa | + | - | + |
| Spn-E | + | - | + |
| bam | + | - | + |
| aub | - | + | + |
| cona | - | - | - |
| **SHW pathway** | diap1 | + | + | + |
| CycE | + | + | + |
| CycA | + | + | + |
| CycB | + | + | + |
| E2f | + | + | + |
| wg | + | + | + |
| ex | - | + | + |
| Ser | - | + | - |
| Mer | - | + | - |
| ban | - | - | + |
| fj | - | - | - |
